# Supplementary material for: Surface-enhanced Raman spectroscopy for the study of interaction of an antibacterial agent ([bis(1,3-dipentyl-1 H -imidazol-2(3 H )-ylidene)silver( i )]bromide) with Bacillus subtilis bacterial biofilms
Source: Royal Society of Chemistry journal article supplement (doi:10.1039/d4ra02047b), 2024-01-01
Supplement: d4ra02047b1.pdf [file d4ra02047b1.pdf]

**Table S1** SERS spectral peak assignments of *Bacillus subtilis* biofilm.

| <b>SERS peak position</b> | <b>SERS peak assignments</b>                                | <b>References</b> |
|---------------------------|-------------------------------------------------------------|-------------------|
| 568 cm <sup>-1</sup>      | Hypoxanthine (DNA)                                          | 1                 |
| 624 cm <sup>-1</sup>      | Aromatic ring skeleton (carbohydrates)                      | 2                 |
| 653 cm <sup>-1</sup>      | Ring vibration in polydeoxyadenosine (DNA)                  | 3                 |
| 675 cm <sup>-1</sup>      | Guanosine (DNA)                                             | 1                 |
| 726 cm <sup>-1</sup>      | Glycosidic ring mode of adenine ( DNA)                      | 2                 |
| 798 cm <sup>-1</sup>      | Ring stretching and breathing mode of Uracil (nucleic acid) | 4                 |
| 908 cm <sup>-1</sup>      | C–O–C stretching of glycosidic linkage in saccharides       | 5                 |
| 954 cm <sup>-1</sup>      | C-N stretching of polyene chain in carbohydrate             | 5                 |
| 1001 cm <sup>-1</sup>     | breathing mode of symmetric ring (protein)                  | 6                 |
| 1093 cm <sup>-1</sup>     | C-C gauche stretching in membrane lipid                     | 7                 |
| 1130 cm <sup>-1</sup>     | C-N stretching in proteins                                  | 6 5               |
| 1243 cm <sup>-1</sup>     | C=O stretching (amide III)                                  | 6                 |
| 1329 cm <sup>-1</sup>     | CH vibration (protein)                                      | 8                 |
| 1450 cm <sup>-1</sup>     | CH <sub>2</sub> vibration (lipids)                          | 9                 |

**Table S2** Some message about Raman peaks

| Raman peaks                                                                                                                                                                                                                                    | Message about Raman peaks                                                                                                                                                                                                                                                                                                                                                                                                                                  |
|------------------------------------------------------------------------------------------------------------------------------------------------------------------------------------------------------------------------------------------------|------------------------------------------------------------------------------------------------------------------------------------------------------------------------------------------------------------------------------------------------------------------------------------------------------------------------------------------------------------------------------------------------------------------------------------------------------------|
| 1329 cm <sup>-1</sup> (C-H vibration) <sup>8</sup> , 1001 cm <sup>-1</sup> (ring breathing mode) <sup>6</sup> , 1130 cm <sup>-1</sup> (C-N stretching) <sup>6</sup> <sup>5</sup> and 1243 cm <sup>-1</sup> (Amide III) <sup>6</sup>            | These Raman peaks are associated with proteins. After the exposure of antibiotic, peak at 1329 cm <sup>-1</sup> shows a continuous decrease in intensity due to conformational changes occurring in protein molecules. Peaks at 1001 cm <sup>-1</sup> , 1143 cm <sup>-1</sup> and 1201 cm <sup>-1</sup> disappear after the exposure of higher concentration of antibacterial agent, indicating the denaturation of proteins and cell death <sup>8</sup> . |
| 1093 cm <sup>-1</sup> (C-C stretching) <sup>7</sup>                                                                                                                                                                                            | This peak is attributed to lipids. Raman peak at 1093 cm <sup>-1</sup> position shows a decrease in intensity after the exposure of antibiotic due to high level of environmental stress <sup>7</sup> . Biofilm responds to stress by increasing the synthesis of lipids <sup>10</sup> .                                                                                                                                                                   |
| 653 cm <sup>-1</sup> (polydeoxyadenosine ring's vibration) <sup>3</sup> , 568 cm <sup>-1</sup> (hypoxanthine) <sup>1</sup> , and 798 cm <sup>-1</sup> (ring stretching and breathing mode of Uracil (nucleic acid) <sup>4</sup>                | These peaks are attributed to genetic material (DNA). After the exposure of antibiotic, Raman peak at 653 cm <sup>-1</sup> shows a decrease in intensity as concentration of lab synthesized antibacterial agent is increased. This decrease indicates the destruction of nucleic acid in <i>Bacillus subtilis</i> biofilm <sup>3</sup> .                                                                                                                  |
| 908 cm <sup>-1</sup> (C–O–C stretching of glycosidic linkage in saccharides) <sup>5</sup> , 954 cm <sup>-1</sup> (C-N stretching of polyene chain in carbohydrate) <sup>5</sup> and 624 cm <sup>-1</sup> (Aromatic ring skeleton) <sup>2</sup> | These peaks are associated to carbohydrates and shows the decrease in intensity after the exposure of antibacterial agent due to the change in carbohydrate's content in <i>Bacillus subtilis</i> biofilm <sup>5</sup> .                                                                                                                                                                                                                                   |
